# Supplementary material for: The TIR-NB-LRR pair DSC1 and WRKY19 contributes to basal immunity of Arabidopsis to the root-knot nematode Meloidogyne incognita
Source: PubMed Central journal article supplement (PMC7020509; doi:10.1186/s12870-020-2285-x), 2020-02-13
Supplement: 12870_2020_2285_MOESM1_ESM.pdf [file 12870_2020_2285_MOESM1_ESM.pdf]

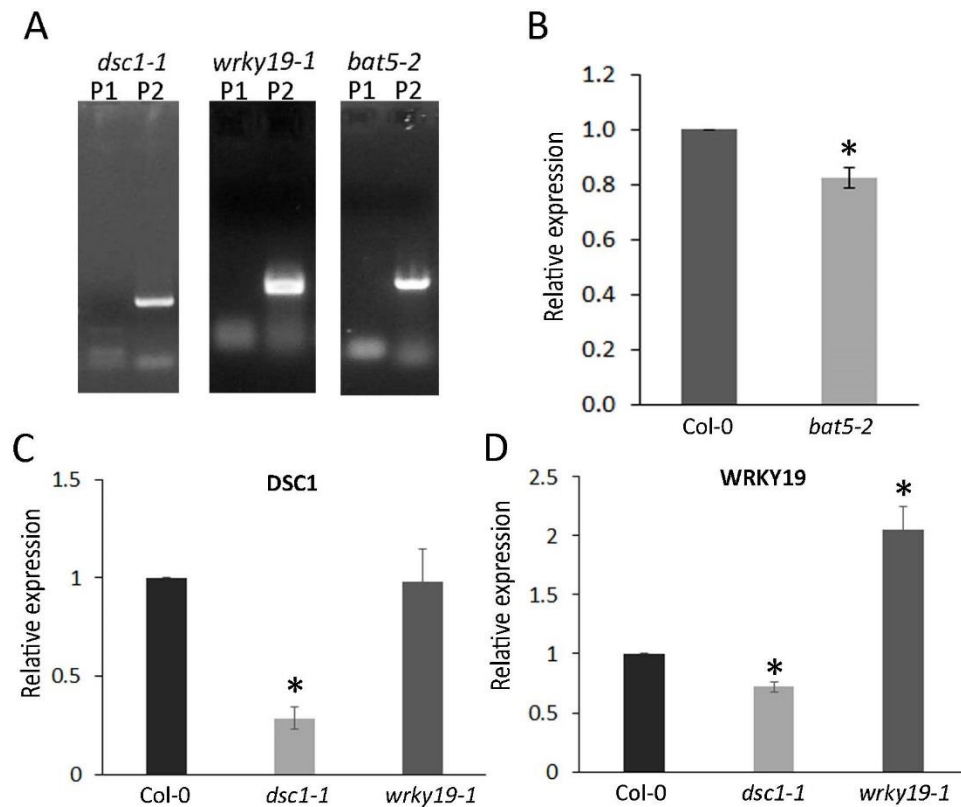

**Additional file 1: Confirmation of T-DNA insert in line *bat5-2*, *dsc1-1* and *wrky19-1* with PCR.** A, allele specific PCRs on genomic DNA isolated from each Arabidopsis mutant line. PCR amplification products using primer combinations for only the wildtype gene allele (P1) and for the wildtype allele including the T-DNA insert (P2). B-D, Relative gene expression of the genes harbouring the T-DNA insert in the mutant lines as compared to the wildtype Arabidopsis Col-0 using quantitative RT-PCR on roots of 14-day old seedlings. B, represents the relative gene expression of *BAT5* in *bat5-2*. C, represents the relative gene expression of *DSC1* in *dsc1-1* and *wrky19-1*. D, represents the relative gene expression of *WRKY19* in *dsc1-1* and *wrky19-1*. Data (B-D) was generated with three independent biological replicates with three technical replicates each.
