# Supplementary material for: The TIR-NB-LRR pair DSC1 and WRKY19 contributes to basal immunity of Arabidopsis to the root-knot nematode Meloidogyne incognita
Source: PubMed Central journal article supplement (PMC7020509; doi:10.1186/s12870-020-2285-x), 2020-02-13
Supplement: 12870_2020_2285_MOESM2_ESM.pdf [file 12870_2020_2285_MOESM2_ESM.pdf]

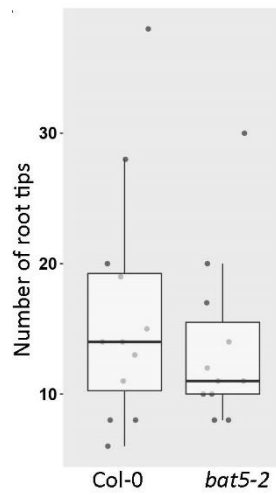

**Additional file 2: Number of root tips for *bat5-2* on 14-day-old seedlings.** Statistically tested with ANOVA and post hoc Tukey test ( $p = 0.05$ ). Data represents two biological replicates.
