# Supplementary material for: The TIR-NB-LRR pair DSC1 and WRKY19 contributes to basal immunity of Arabidopsis to the root-knot nematode Meloidogyne incognita
Source: PubMed Central journal article supplement (PMC7020509; doi:10.1186/s12870-020-2285-x), 2020-02-13
Supplement: 12870_2020_2285_MOESM4_ESM.pdf [file 12870_2020_2285_MOESM4_ESM.pdf]

**Additional file 4: 245 regulated genes in *wrky19-1* during *M. incognita* infection with significance**

**>7 or with a relative expression of <-0.3 or >0.3.**

| Gene ID   | Significance | Relative expression | Gene ID   | Significance | Relative expression |
|-----------|--------------|---------------------|-----------|--------------|---------------------|
| AT2G38330 | 9.00         | 0.18                | AT3G45130 | 6.59         | -0.38               |
| AT5G51860 | 8.53         | 0.09                | AT2G02300 | 3.33         | -0.38               |
| AT5G45380 | 8.41         | -0.09               | AT5G44550 | 3.37         | -0.37               |
| AT1G34320 | 8.11         | -0.18               | AT3G47480 | 3.77         | -0.37               |
| AT5G14470 | 7.96         | -0.19               | AT1G32940 | 4.13         | -0.37               |
| AT5G63730 | 7.53         | -0.29               | AT4G12550 | 3.76         | -0.37               |
| AT5G46470 | 7.45         | -0.11               | AT5G41040 | 5.08         | -0.37               |
| AT5G38320 | 7.30         | -0.30               | AT4G09100 | 3.84         | -0.37               |
| AT4G32890 | 7.25         | 0.23                | AT5G48180 | 2.96         | -0.37               |
| AT4G36540 | 7.23         | 0.13                | AT5G50200 | 4.07         | -0.37               |
| AT4G05020 | 7.18         | -0.16               | AT1G47890 | 4.06         | -0.37               |
| AT1G09770 | 7.15         | 0.13                | AT1G05880 | 3.21         | -0.37               |
| AT1G12440 | 7.12         | 0.17                | AT1G79330 | 2.85         | -0.37               |
| AT3G23840 | 7.02         | -0.20               | AT3G48640 | 4.31         | -0.37               |
| AT5G08250 | 3.09         | -0.76               | AT5G05500 | 3.83         | -0.36               |
| AT5G38910 | 3.34         | -0.74               | AT4G12545 | 3.85         | -0.36               |
| AT4G26010 | 3.68         | -0.73               | AT2G29620 | 3.13         | -0.36               |
| AT3G47340 | 3.28         | -0.71               | AT4G25790 | 4.53         | -0.36               |
| AT1G34510 | 3.09         | -0.67               | AT1G34050 | 3.20         | -0.36               |
| AT3G62680 | 3.51         | -0.67               | AT5G61010 | 3.50         | -0.36               |
| AT4G25820 | 4.05         | -0.65               | AT2G05910 | 3.26         | -0.36               |
| AT2G44925 | 3.02         | -0.65               | AT3G22565 | 4.21         | -0.36               |
| AT3G12700 | 2.86         | -0.62               | AT1G11190 | 2.78         | -0.36               |
| AT5G22555 | 3.26         | -0.61               | AT4G37290 | 3.90         | -0.36               |
| AT2G39010 | 3.87         | -0.60               | AT1G68450 | 3.12         | -0.36               |
| AT5G57625 | 4.36         | -0.60               | AT5G58840 | 3.61         | -0.36               |
| AT4G02270 | 2.98         | -0.59               | AT2G20825 | 2.71         | -0.36               |
| AT2G43580 | 5.29         | -0.59               | AT1G02575 | 2.69         | -0.36               |
| AT5G57625 | 3.59         | -0.58               | AT1G01560 | 3.20         | -0.36               |
| AT2G26560 | 4.19         | -0.57               | AT3G05155 | 4.05         | -0.35               |
| AT1G62980 | 3.81         | -0.57               | AT5G41570 | 2.74         | -0.35               |
| AT1G29020 | 3.68         | -0.57               | AT3G15700 | 2.84         | -0.35               |
| AT5G17820 | 4.10         | -0.54               | AT1G65670 | 2.93         | -0.35               |
| AT4G25220 | 3.20         | -0.54               | AT3G49580 | 3.62         | -0.35               |
| AT2G46740 | 3.26         | -0.54               | AT1G01750 | 4.38         | -0.35               |
| AT4G40090 | 2.96         | -0.53               | AT3G55130 | 3.04         | -0.35               |
| AT2G43590 | 3.48         | -0.53               | AT1G44970 | 3.40         | -0.35               |
| AT2G26560 | 4.46         | -0.52               | AT3G51350 | 2.88         | -0.35               |
| AT5G20790 | 4.72         | -0.52               | AT2G28700 | 2.95         | -0.35               |
| AT3G09925 | 3.48         | -0.52               | AT1G17615 | 3.91         | -0.35               |

|           |      |       |           |      |       |
|-----------|------|-------|-----------|------|-------|
| AT2G43590 | 2.89 | -0.52 | AT4G25110 | 2.93 | -0.35 |
| AT1G02360 | 5.05 | -0.51 | AT5G01490 | 3.91 | -0.35 |
| AT3G03530 | 3.88 | -0.51 | AT5G48850 | 3.28 | -0.35 |
| AT3G30775 | 2.88 | -0.51 | AT1G74460 | 3.25 | -0.35 |
| AT5G62110 | 2.71 | -0.50 | AT1G51620 | 3.02 | -0.35 |
| AT2G24720 | 3.24 | -0.50 | AT3G52820 | 3.21 | -0.35 |
| AT1G78000 | 3.37 | -0.49 | AT1G08790 | 5.86 | -0.35 |
| AT5G26300 | 3.27 | -0.49 | AT5G59680 | 2.80 | -0.34 |
| AT3G16530 | 2.87 | -0.49 | AT5G22460 | 2.84 | -0.34 |
| AT1G01680 | 3.60 | -0.48 | AT1G55020 | 2.85 | -0.34 |
| AT4G30320 | 4.07 | -0.48 | AT4G26790 | 2.99 | -0.34 |
| AT1G30870 | 4.07 | -0.47 | AT4G26790 | 4.12 | -0.34 |
| AT4G09110 | 4.41 | -0.46 | AT5G50750 | 3.49 | -0.34 |
| AT1G66200 | 4.39 | -0.46 | AT1G04220 | 2.81 | -0.33 |
| AT5G39580 | 3.02 | -0.46 | AT1G08050 | 3.96 | -0.33 |
| AT1G11655 | 3.27 | -0.46 | AT3G04720 | 3.65 | -0.33 |
| AT3G48640 | 3.81 | -0.46 | AT5G53870 | 3.06 | -0.33 |
| AT5G24210 | 2.84 | -0.46 | AT1G53270 | 3.55 | -0.33 |
| AT1G24020 | 3.98 | -0.46 | AT3G19615 | 2.66 | -0.33 |
| AT5G54040 | 2.87 | -0.46 | AT1G51800 | 3.07 | -0.33 |
| AT3G60330 | 3.50 | -0.45 | AT2G28160 | 3.18 | -0.33 |
| AT4G16260 | 2.94 | -0.45 | AT1G70410 | 3.09 | -0.33 |
| AT3G12540 | 3.99 | -0.45 | AT4G24140 | 4.44 | -0.33 |
| AT1G34520 | 3.13 | -0.45 | AT4G25310 | 3.28 | -0.33 |
| AT4G32810 | 3.20 | -0.45 | AT1G54540 | 4.35 | -0.33 |
| AT3G49960 | 2.96 | -0.45 | AT3G12540 | 3.92 | -0.33 |
| AT2G25240 | 3.51 | -0.45 | AT4G12010 | 5.20 | -0.32 |
| AT1G32350 | 4.31 | -0.45 | AT5G58860 | 2.84 | -0.32 |
| AT2G31425 | 2.99 | -0.44 | AT1G05560 | 2.78 | -0.32 |
| AT5G16980 | 2.85 | -0.44 | AT3G24290 | 2.77 | -0.32 |
| AT3G13610 | 6.66 | -0.44 | AT2G36295 | 2.73 | -0.32 |
| AT4G29180 | 4.01 | -0.44 | AT3G62590 | 4.77 | -0.32 |
| AT1G02220 | 2.92 | -0.44 | AT5G65980 | 4.36 | -0.32 |
| AT3G10710 | 3.30 | -0.44 | AT5G64100 | 3.78 | -0.32 |
| AT5G43520 | 3.88 | -0.43 | AT2G43820 | 3.26 | -0.32 |
| AT4G28940 | 3.95 | -0.43 | AT4G30140 | 4.67 | -0.32 |
| AT3G48850 | 4.13 | -0.43 | AT5G13580 | 3.14 | -0.32 |
| AT1G48260 | 3.62 | -0.43 | AT1G71140 | 4.17 | -0.31 |
| AT5G25260 | 4.72 | -0.43 | AT1G78990 | 3.61 | -0.31 |
| AT4G16260 | 2.65 | -0.43 | AT2G33710 | 2.90 | -0.31 |
| AT1G66200 | 2.89 | -0.42 | AT4G18250 | 2.77 | -0.31 |
| AT1G60050 | 2.66 | -0.42 | AT5G59130 | 4.23 | -0.31 |
| AT3G46280 | 2.87 | -0.42 | AT5G06720 | 3.08 | -0.31 |
| AT1G51880 | 3.04 | -0.42 | AT5G49340 | 3.45 | -0.31 |
| AT4G33020 | 3.78 | -0.42 | AT2G26410 | 3.17 | -0.31 |
| AT3G16150 | 3.01 | -0.42 | AT4G35420 | 4.76 | -0.31 |
| AT1G24020 | 4.69 | -0.42 | AT4G25030 | 3.10 | -0.31 |
| AT5G42510 | 4.02 | -0.42 | AT3G63380 | 3.65 | -0.31 |

|           |      |       |           |      |       |
|-----------|------|-------|-----------|------|-------|
| AT1G24020 | 3.49 | -0.42 | AT4G16920 | 3.41 | -0.31 |
| AT2G20520 | 3.51 | -0.42 | AT2G23130 | 5.12 | -0.31 |
| AT4G10510 | 3.73 | -0.41 | AT1G57630 | 2.99 | -0.31 |
| AT4G36820 | 5.02 | -0.41 | AT2G44260 | 3.16 | -0.31 |
| AT5G24210 | 2.74 | -0.41 | AT4G24310 | 2.73 | -0.31 |
| AT5G39050 | 3.49 | -0.41 | AT1G29000 | 3.06 | -0.31 |
| AT1G13110 | 2.88 | -0.41 | AT1G56010 | 2.81 | -0.31 |
| AT2G21900 | 2.85 | -0.41 | AT3G62730 | 3.96 | -0.30 |
| AT1G74790 | 3.50 | -0.41 | AT3G51360 | 3.23 | -0.30 |
| AT3G44550 | 4.32 | -0.41 | AT5G20860 | 3.18 | -0.30 |
| AT1G02220 | 3.20 | -0.41 | AT2G18480 | 3.64 | -0.30 |
| AT5G49350 | 3.59 | -0.41 | AT4G25190 | 3.37 | -0.30 |
| AT3G14770 | 3.02 | -0.41 | AT2G41540 | 3.25 | -0.30 |
| AT3G22370 | 2.68 | -0.41 | At1G64790 | 2.84 | 1.19  |
| AT1G74000 | 3.31 | -0.40 | AT1G66870 | 2.81 | 0.62  |
| AT3G12700 | 4.31 | -0.40 | AT3G48740 | 2.72 | 0.58  |
| AT5G20860 | 3.27 | -0.40 | AT3G27940 | 3.18 | 0.54  |
| AT2G43510 | 3.24 | -0.40 | AT5G23660 | 2.77 | 0.53  |
| AT4G16260 | 3.30 | -0.40 | AT4G08290 | 3.71 | 0.48  |
| AT3G12700 | 3.36 | -0.40 | AT5G48110 | 3.23 | 0.45  |
| AT2G20520 | 2.98 | -0.40 | AT2G22980 | 3.57 | 0.45  |
| AT4G26790 | 4.44 | -0.40 | AT5G42200 | 6.13 | 0.42  |
| AT3G46270 | 3.98 | -0.40 | AT5G45310 | 2.80 | 0.38  |
| AT5G50260 | 2.74 | -0.39 | AT3G59480 | 3.18 | 0.38  |
| AT5G19790 | 3.88 | -0.39 | AT5G42200 | 2.95 | 0.38  |
| AT5G12420 | 4.56 | -0.39 | AT3G56210 | 2.78 | 0.37  |
| AT4G13890 | 2.96 | -0.39 | AT1G74500 | 3.07 | 0.36  |
| AT3G47780 | 2.89 | -0.39 | AT4G01330 | 3.34 | 0.36  |
| AT1G48930 | 3.20 | -0.39 | AT2G14210 | 3.06 | 0.35  |
| AT1G20180 | 3.95 | -0.39 | AT4G37260 | 3.36 | 0.35  |
| AT4G02700 | 3.23 | -0.38 | AT4G07825 | 6.42 | 0.34  |
| AT5G02230 | 5.73 | -0.38 | AT4G14270 | 2.66 | 0.32  |
| AT5G46950 | 2.85 | -0.38 | AT2G22990 | 2.66 | 0.32  |
| AT4G34930 | 2.77 | -0.38 | AT1G19610 | 3.20 | 0.32  |
|           |      |       | AT5G25620 | 3.13 | 0.31  |
