# Supplementary material for: The TIR-NB-LRR pair DSC1 and WRKY19 contributes to basal immunity of Arabidopsis to the root-knot nematode Meloidogyne incognita
Source: PubMed Central journal article supplement (PMC7020509; doi:10.1186/s12870-020-2285-x), 2020-02-13
Supplement: 12870_2020_2285_MOESM5_ESM.pdf [file 12870_2020_2285_MOESM5_ESM.pdf]

**Additional file 5: Overview of primers used in RT-qPCR and for confirmation of T-DNA insert.**

| <b>Identifier</b>      | <b>Forward</b>                                     | <b>Reverse</b>         |
|------------------------|----------------------------------------------------|------------------------|
| <b>Expression of</b>   |                                                    |                        |
| At4G12010 (DSC1)       | TCGTGGGTCATGCTCGAATC                               | ACTCGGTATTTTCAGTGGCCG  |
| At4G12020 (WRKY19)     | AATGTCCCTCTGGCGAACTC                               | CAGTACACCCAAGGCTCCAT   |
| At4G12030 (BAT5)       | CGAGTTGCGAATTTCCCACG                               | GCTCGTTTGAGTCAGATTCCGG |
| At4G12040 (SAP7)       | TCCGACTTTTCTGTTGAAGGTGA<br>AAGATGAAGAACAAAATTCCAGC | CATGTTGGATGGTGACCCGA   |
| At4G12050 (AHL26)      | TT                                                 | CTAGCATGGAAAGGAGGAGGA  |
| At5G60390 (EF1a)       | GAGTACCACCTTTGGGACG                                | TTGGGTCCTTCTTGCCACG    |
| <b>T-DNA insert</b>    |                                                    |                        |
| <i>DSC1</i> wildtype   | TTAAGCGGAAACAACATCGAG                              | ACAACCTGGTTCTTCACCACC  |
| <i>dsc1-1</i> allele   | ATTTTGCCGATTTCGGAAC                                | ACAACCTGGTTCTTCACCACC  |
| <i>WRKY19</i> wildtype | TTCATCAACAAGTTTGGCCTC                              | CCAATCATCATTATAACCGG   |
| <i>wrky19-1</i> allele | ATTTTGCCGATTTCGGAAC                                | CCAATCATCATTATAACCGG   |
| <i>BAT5</i> wildtype   | TTCTTTCACATGGTTCAAGCC                              | ACAGCCGACCATAAACAACAG  |
| <i>bat5-2</i> allele   | ATTTTGCCGATTTCGGAAC                                | ACAGCCGACCATAAACAACAG  |
