# Supplementary material for: The TIR-NB-LRR pair DSC1 and WRKY19 contributes to basal immunity of Arabidopsis to the root-knot nematode Meloidogyne incognita
Source: PubMed Central journal article supplement (PMC7020509; doi:10.1186/s12870-020-2285-x), 2020-02-13
Supplement: 12870_2020_2285_MOESM6_ESM.pdf [file 12870_2020_2285_MOESM6_ESM.pdf]

**Additional file 6: Overview of primers used in RT-qPCR for six selected genes from Table 1**

| <b>Gene ID</b> | <b>Gene Description</b>                                      | <b>WRKY domain</b> | <b>Primer Sequence</b>                                    |
|----------------|--------------------------------------------------------------|--------------------|-----------------------------------------------------------|
| AT1G56280      | drought-induced 19 (Di19)                                    | No                 | For: GAGTTTGCTTGCCCGTTCTG<br>Rev: GGCATACCGGTTCTTCGAC     |
| AT5G06905      | Cytochrome P450, family 93, subfamily D peptide 1            | Yes                | For: TCACGCTTCTCTGGTGTGAG<br>Rev: AGCAGTCCCTGAAGCCGAA     |
| AT5G06900      | Cytochrome P450, family 712, subfamily A polypeptide 2       | Yes                | For: CAAGCTCTCAATCCGCTACGG<br>Rev: TGCATTGTGGGACGGTTCAG   |
| AT5G45380      | DEGRADATION OF UREA 3 (DUR3)                                 | Yes                | For: GCAGTATGGGGTTAGTGGACC<br>Rev: ACCGTGTGAGCATTAGGAGC   |
| AT5G23660      | Sugars Will Eventually be Exported Transporter 12 (SWEET 12) | No                 | For: CGATGCTTTGGCTCTACTACGC<br>Rev: GCGAAGGCAACAAAGATGGAG |
| AT4G26010      | Peroxidase super family protein                              | Yes                | For: GACTCGGTCGCATTAGCTGG<br>Rev: CGGAATTGTTGGTCCGGGTA    |
